# Supplementary material for: Protein engineering using variational free energy approximation
Source: Springer Nature journal article supplement (doi:10.1038/s41467-024-54814-w), 2024-12-01
Supplement: MOESM1 [file 41467_2024_54814_MOESM1_ESM.pdf]

# Supplementary materials: Protein engineering using variational free energy approximation

Evgenii Lobzaev<sup>1,2</sup>, Michael A. Herrera<sup>1</sup>, Martyna Kasprzyk<sup>1</sup>, and Giovanni Stracquadanio<sup>1,\*</sup>

<sup>1</sup>School of Biological Sciences, The University of Edinburgh, Edinburgh EH9 3BF, United Kingdom

<sup>2</sup>School of Informatics, The University of Edinburgh, Edinburgh EH8 9AB, United Kingdom

\*Corresponding author. Email: giovanni.stracquadanio@ed.ac.uk.

## List of Figures

|    |                                                                                                                               |    |
|----|-------------------------------------------------------------------------------------------------------------------------------|----|
| 1  | <b>Abridged bacterial L-arginine biosynthetic pathway.</b>                                                                    | 3  |
| 2  | <b>PRotein Engineering by Variational frEe eNergy approximaTion (PREVENT).</b>                                                | 4  |
| 3  | <b>Test set for model evaluation.</b>                                                                                         | 4  |
| 4  | <b>Commercial <i>E. coli</i> BW25113 <math>\Delta</math>argB cured using Flp-FRT recombination.</b>                           | 5  |
| 5  | <b>Construction and expression of pKCHU-argB.</b>                                                                             | 6  |
| 6  | <b>Nucleotide alignment of native and re-coded <i>E. coli</i> argB coding sequences.</b>                                      | 7  |
| 7  | <b>Performance of BW25113 <math>\Delta</math>argB transformed using native or re-coded pKCHU-argB expression constructs.</b>  | 8  |
| 8  | <b>Robust <i>E. coli</i> transformation using an Opentrons OT-2 robot.</b>                                                    | 9  |
| 9  | <b>Exemplar transformation plate of <i>EcNAGK</i> variants, demonstrating the array of library transformation efficiency.</b> | 9  |
| 10 | <b><i>EcNAGK</i> hydropathy plot with top performing candidates mutations.</b>                                                | 10 |
| 11 | <b>Conservation for Gly123.</b>                                                                                               | 10 |
| 12 | <b>RT-qPCR of the top performing candidates from each category.</b>                                                           | 11 |
| 13 | <b>Uncropped scan of colony PCR (Supplementary Figure 5B).</b>                                                                | 11 |
| 14 | <b>Uncropped scan of SDS-PAGE analysis (Supplementary Figure 5C).</b>                                                         | 12 |

## List of Tables

|   |                                                                                                                                               |    |
|---|-----------------------------------------------------------------------------------------------------------------------------------------------|----|
| 1 | Models performance on test set. . . . .                                                                                                       | 13 |
| 2 | Hyperparameter analysis on test set. . . . .                                                                                                  | 14 |
| 3 | Hyperparameter analysis on 40 designed <i>EcNAGK</i> variants. . . . .                                                                        | 14 |
| 4 | Basic parts used for the creation of pKCHU- <i>argB</i> . . . . .                                                                             | 14 |
| 5 | Sequencing primers used for pKCHU- <i>argB</i> expression constructs (wildtype and variant). . . . .                                          | 15 |
| 6 | RT-qPCR primers used for pKCHU- <i>argB</i> expression constructs (native wildtype, re-coded wildtype and variants) and <i>rrsA</i> . . . . . | 15 |
| 7 | Lag phase duration for selected variants. . . . .                                                                                             | 15 |

## Supplementary Figures

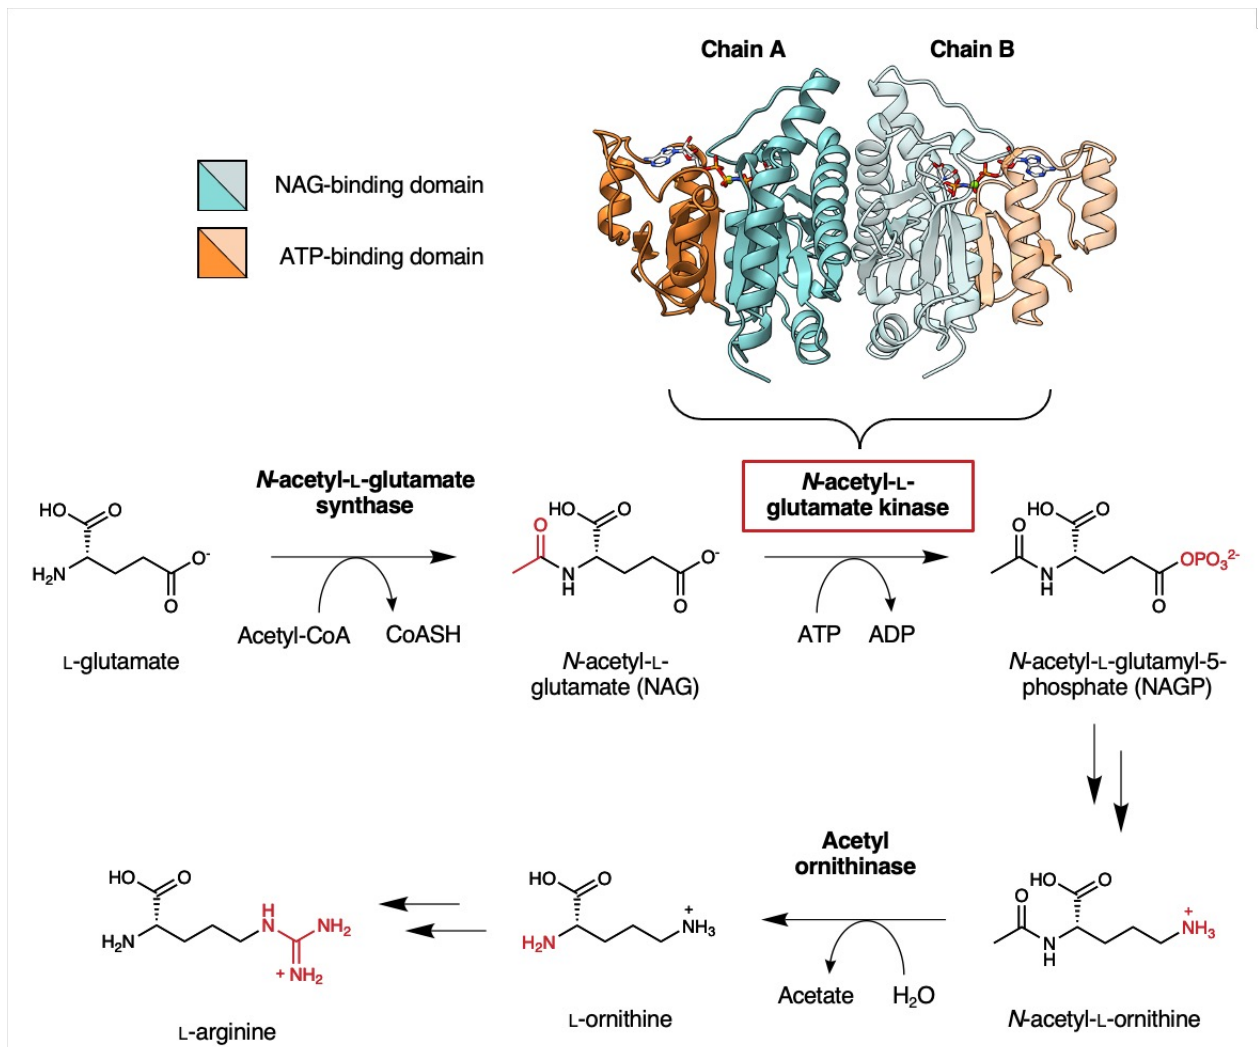

**Supplementary Figure 1: Abridged bacterial L-arginine biosynthetic pathway.** The crystal structure of the target *E. coli* N-acetyl-L-glutamate kinase (*EcNAGK*) (PDB: 1GS5) is shown.

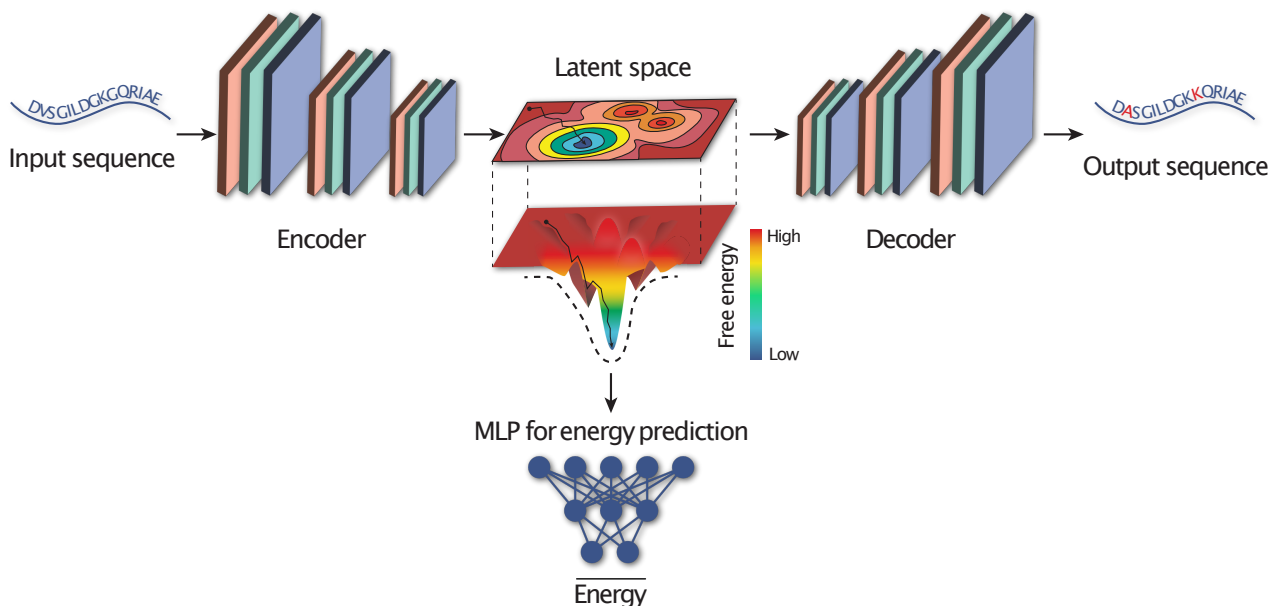

**Supplementary Figure 2: PRotein Engineering by Variational frEe eNergy approximaTion (PREVENT).** The model takes in input protein sequences and associated free energy values and uses a transformer encoder to map this information to a latent Gaussian space. Samples from the latent space are then sampled and decoded by transformer decoder, to obtain an amino acid sequence, and a multi-layer perceptron to obtain the expected free energy value.

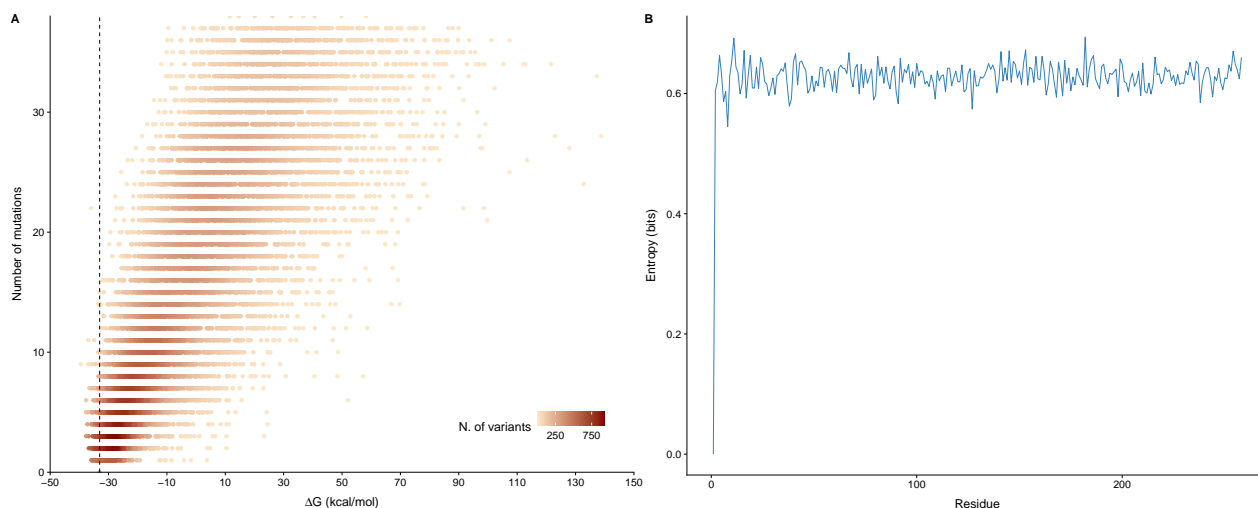

**Supplementary Figure 3: Test set for model evaluation.** A) Thermodynamic landscape approximation ( $\Delta G$ ) as a function of the number of mutations in *EcNAGK* variants in the test dataset. Black dashed line denotes the free energy of the wildtype *EcNAGK*. B) Amino acid entropy of *EcNAGK* variants in the test dataset. Every position, except the first methionine, is mutated in 6.58% of the generated variant.

***E. coli* BW25113  $\Delta argB$  (cured)**

---

No Antibiotic

Kanamycin

Carbenicillin

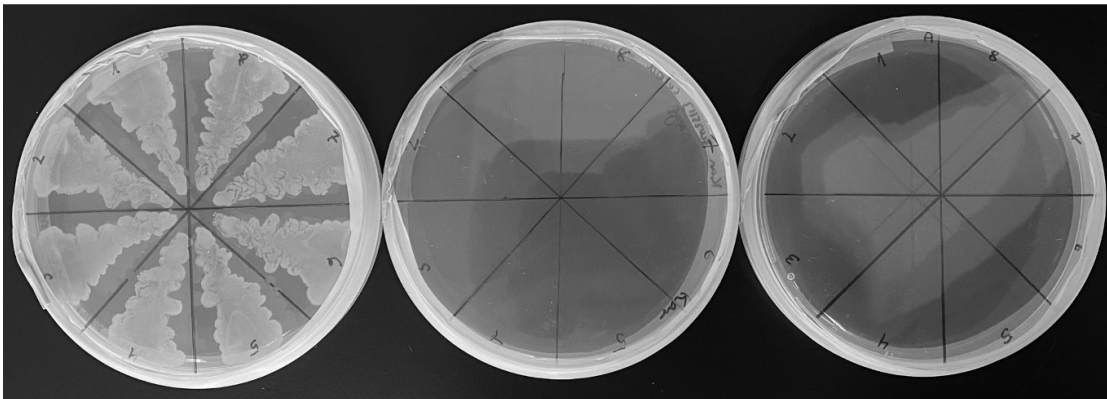

**Supplementary Figure 4: Commercial *E. coli* BW25113  $\Delta argB$  cured using Flp-FRT recombination.** Eight putatively cured colonies were streaked on selective and nonselective YEP-agar plates to test their re-engineered susceptibility to antibiotics.

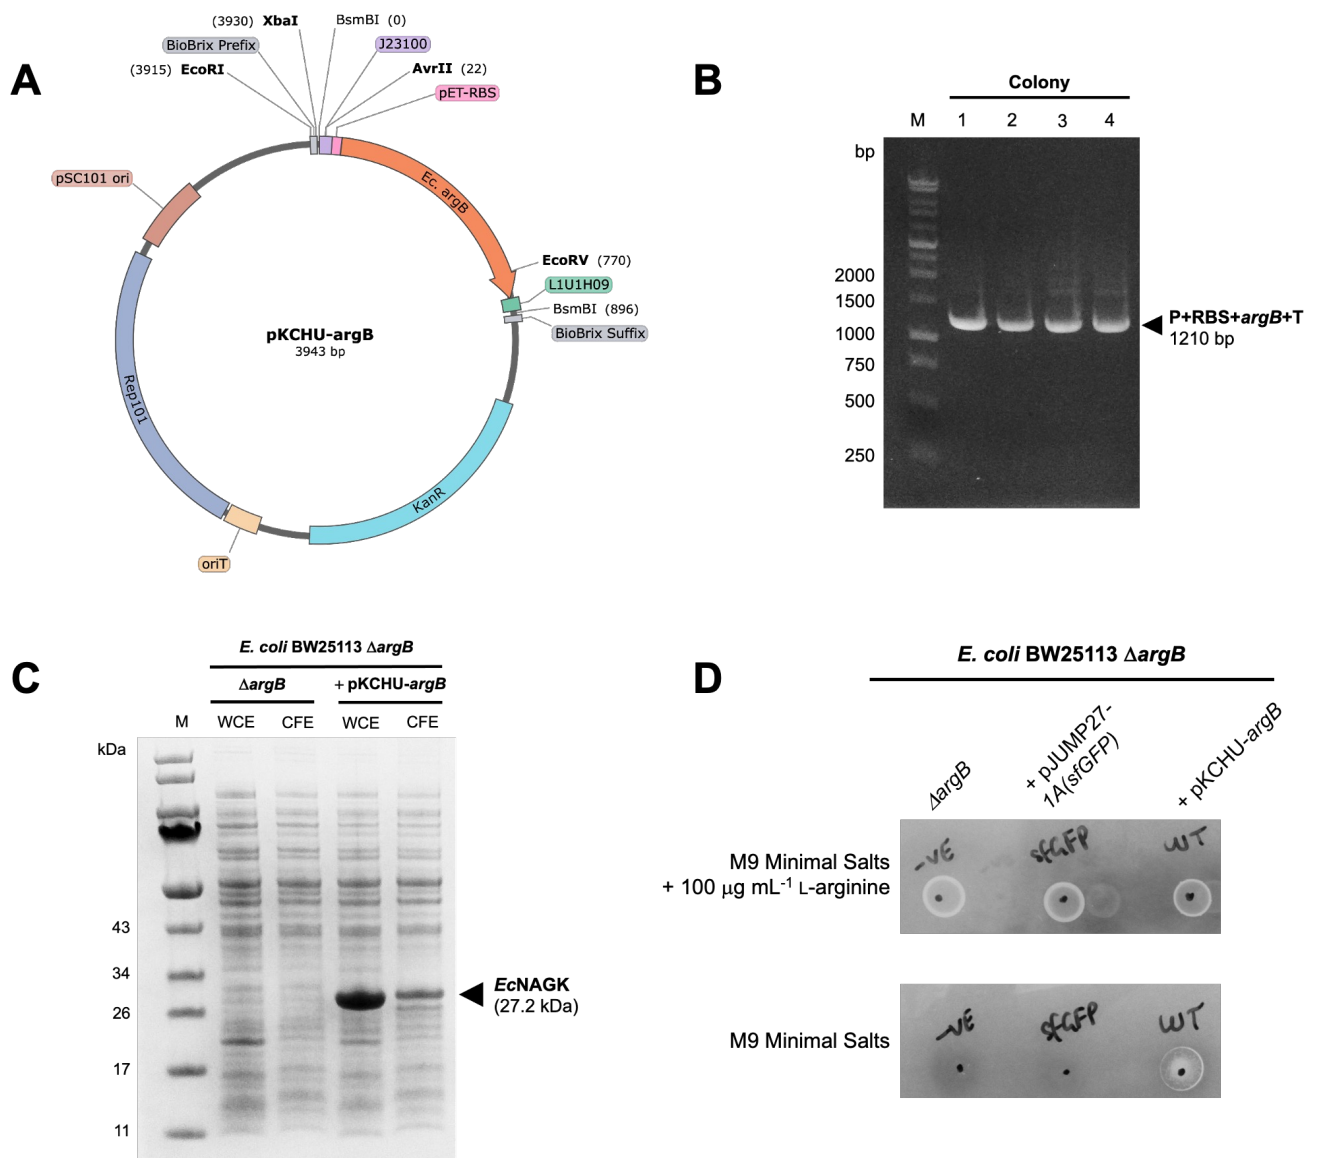

**Supplementary Figure 5: Construction and expression of pKCHU-argB.** A) Plasmid map highlighting key features of pKCHU-argB including the promoter (J23100), RBS (pET-RBS) and terminator (L1U1H09). pJUMP27-1A(sfGFP) was selected as the destination vector for assembly. B) Colony PCR of NEB5-alpha transformants following the level 0 JUMP assembly of pKCHU-argB. Backbone-specific primers provided complete coverage of the assembled promoter, RBS, CDS and terminator (1210 bp). C) SDS-PAGE analysis of BW25113  $\Delta$ argB cultures with and without pKCHU-argB. Whole-cell extracts (WCE) show the total protein content (soluble and insoluble) of the biomass sample. Cell-free extracts (CFE) show soluble protein content of the biomass sample following non-mechanical lysis and lysate clarification. D) Auxotrophic selection of pKCHU-argB transformants on M9 salts minimal media after 48 hours of incubation. Both untransformed and pJUMP27-1A(sfGFP)-transformed cells were used as negative controls. A positive control plate containing supplemental L-arginine is also shown.

1 10 20 30 40 50 60

argB\_Native ATGATGAA TCCATTAATATCAAACCTGGG CCGGTGTCTGCTGGA TAGTGAAGA GCGCTG

argB\_Re-coded ATGATGAA CCGCTGATATCAAACCTGGG TGGTGTCTGCTGGA CTC TGAAGA AGCTCTG

70 80 90 100 110 120

argB\_Native GAACGTCTGTT TAGCGCACTGGTGAATTAATCGTGA GTCACAT CAGCGTCCGCTGGT GAT

argB\_Re-coded GAACGTCTGTT CTCTGCTCTGGT TAACTACCGTGAATCTCAC CAGCGTCCGCTGGT TATC

130 140 150 160 170 180

argB\_Native GTGCACGGCGGCGGTTGCGTGTGATGAGCTGATGAAAGGCTGAACTGCGCGGTGAAA

argB\_Re-coded GTGCACGGTGGTGGTTGCGTGTGATGAGCTGATGAAAGGCTGAACTGCGCGGTGAAA

190 200 210 220 230 240

argB\_Native AAGAAAAACGGCTCTGCGGTGTGACGCTGCTGATCAGATAGACATATCACCAGGAGCACTG

argB\_Re-coded AAGAAAAACGGCTCTGCGGTGTGACGCTGCTGATCAGATAGACATATCACCAGGAGCACTG

250 260 270 280 290 300

argB\_Native GCGGGAACGGCAAAATAAAACCCCTGTGGCTGGGCAAGAAACA CAGATTCGCGCCGTA

argB\_Re-coded GCGGGAACGGCAAAATAAAACCCCTGTGGCTGGGCAAGAAACA CAGATTCGCGCCGTA

310 320 330 340 350 360

argB\_Native GGTGTGTTTCTCGGTGACGGCGACAGCGTCAAAGTGACCCAGCTTGATGAAGAGTGGT

argB\_Re-coded GGTGTGTTTCTCGGTGACGGCGACAGCGTCAAAGTGACCCAGCTTGATGAAGAGTGGT

370 380 390 400 410 420

argB\_Native CATGTTGGACTGGCGCAGCCAGGTTCCCTAACTATCAACTCTCTGCTGGAAGACGGT

argB\_Re-coded CATGTTGGACTGGCGCAGCCAGGTTCCCTAACTATCAACTCTCTGCTGGAAGACGGT

430 440 450 460 470 480

argB\_Native TATCTGCCGGTGTGTCAGCTCATTTGGCTAGACGACGAAGGCACTGATGAACGTCAA

argB\_Re-coded TATCTGCCGGTGTGTCAGCTCATTTGGCTAGACGACGAAGGCACTGATGAACGTCAA

490 500 510 520 530 540

argB\_Native GCGGACCAGGCGGCAACGGCTGGCGGCAACGCTGGGCGGCGATCTGATTTTGCTCTC

argB\_Re-coded GCGGACCAGGCGGCAACGGCTGGCGGCAACGCTGGGCGGCGATCTGATTTTGCTCTC

550 560 570 580 590 600

argB\_Native GACGTGACGCGGCTATCTCGACGGCAAAAGGCAACGCTATGCGTGAATGACCGCGCGAAA

argB\_Re-coded GACGTGACGCGGCTATCTCGACGGCAAAAGGCAACGCTATGCGTGAATGACCGCGCGAAA

610 620 630 640 650 660

argB\_Native GCAAAACAACCTGATTGAGCAGGGCATTTATTAATGACGGCATGATAGTGAAGTGAACGGG

argB\_Re-coded GCAAAACAACCTGATTGAGCAGGGCATTTATTAATGACGGCATGATAGTGAAGTGAACGGG

670 680 690 700 710 720

argB\_Native GCGCTGGAATGCGGCGCGACGCTGGGCGTCCGGTATGATATCGCTCTGCGGTCAATGCG

argB\_Re-coded GCGCTGGAATGCGGCGCGACGCTGGGCGTCCGGTATGATATCGCTCTGCGGTCAATGCG

730 740 750 760 770

argB\_Native GAGCAGCTTCCGGCACTGTTTAACGGTATGCCGATGGGTACCGGATTTTAACTTAA

argB\_Re-coded GAGCAGCTTCCGGCACTGTTTAACGGTATGCCGATGGGTACCGGATTTTAACTTAA

**Supplementary Figure 6: Nucleotide alignment of native and re-coded *E. coli* *argB* coding sequences.** Visualisation was performed using ESript 3.0.

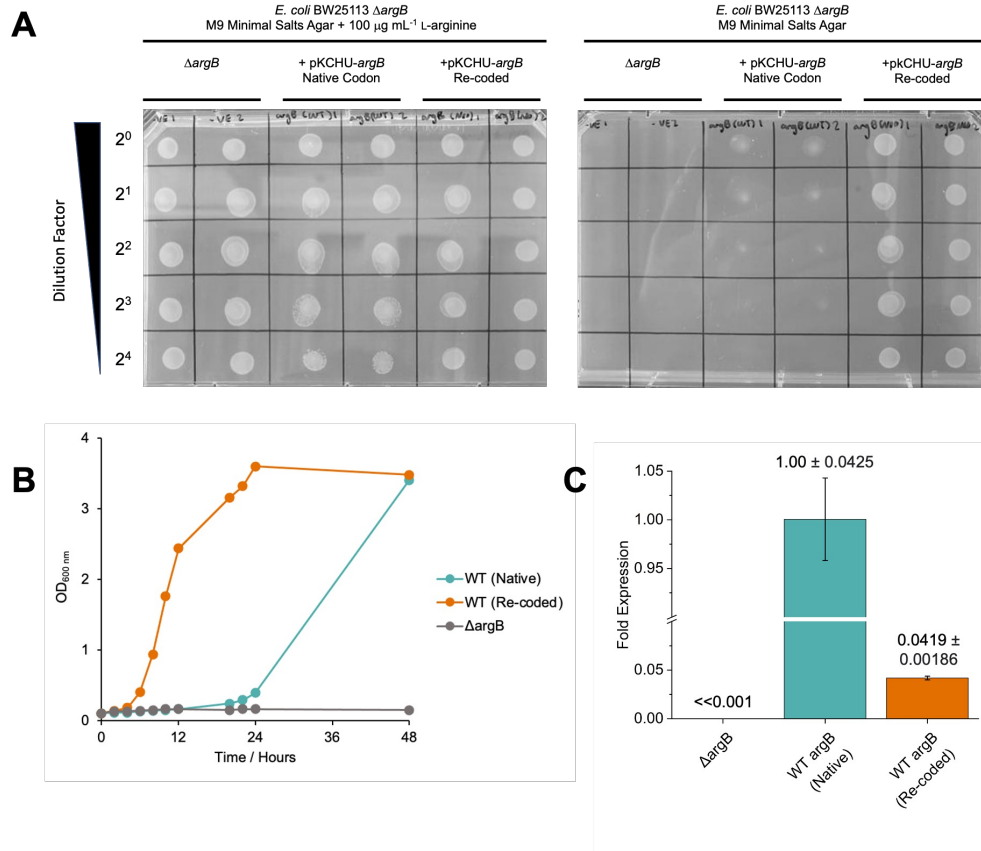

**Supplementary Figure 7: Performance of BW25113  $\Delta argB$  transformed using native or re-coded pKCHU-*argB* expression constructs.** A) Growth discrepancy between pKCHU-*argB* transformants expressing the native or re-coded *argB* on M9 minimal salts agar. A positive control plate containing supplemental L-arginine is also shown. Images were captured after 24 hours of incubation. Experiments were performed in biological duplicate. B) Growth curve comparison of pKCHU-*argB* transformants expressing native or re-coded *argB* in M9 salts minimal media. C) Relative fold-expression of native and re-coded *argB* determined by RT-qPCR. Error bars represent standard deviation of 3 technical replicates.



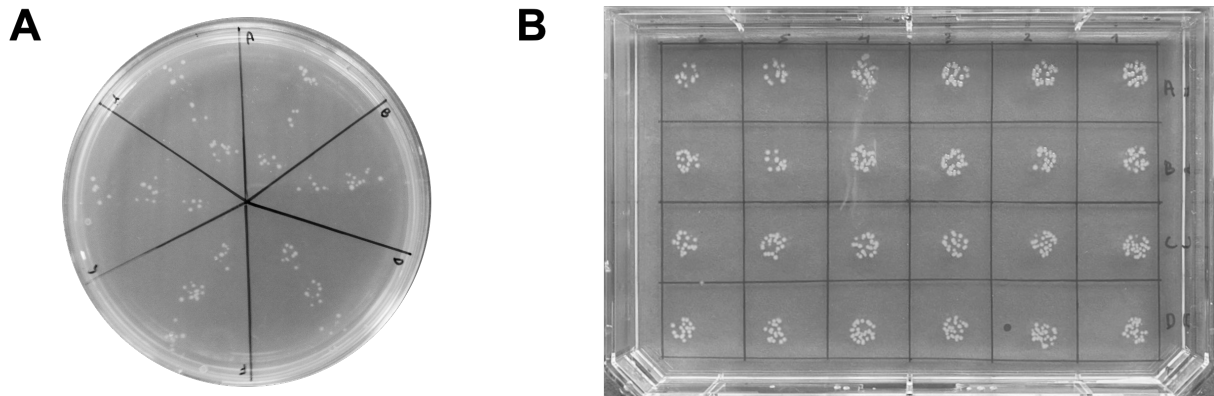

**Supplementary Figure 8: Robust *E. coli* transformation using an Opentrons OT-2 robot.** A) *E. coli* DH5 $\alpha$  transformed using pKCHU-*argB* and spotted manually on YEP-kanamycin agar. Each segment represents a single biological replicate. B) *E. coli* DH5 $\alpha$  transformed using pET23b-*EGFP* and spotted automatically on YEP-carbenicillin agar. Each spot represents a single biological replicate.

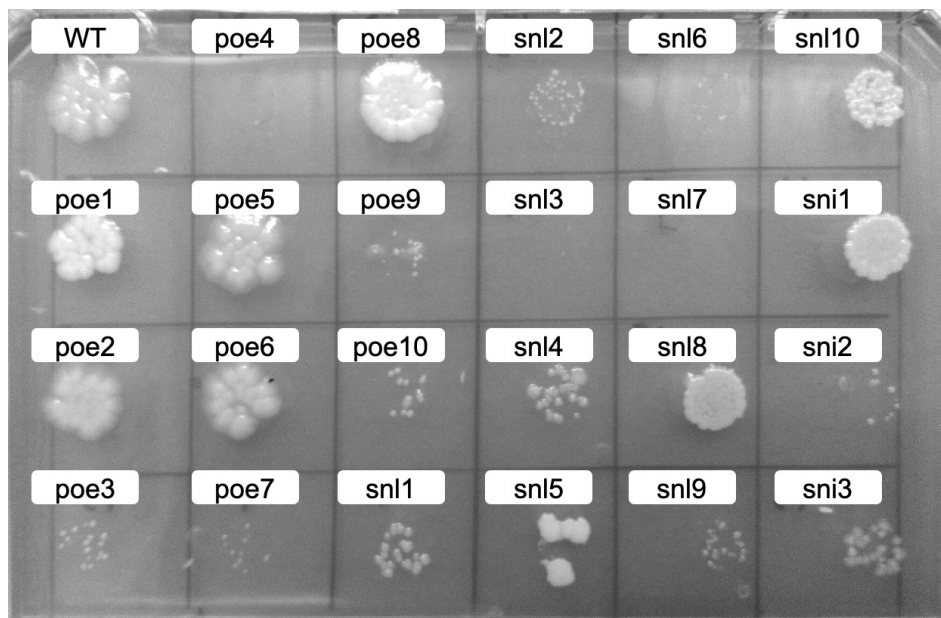

**Supplementary Figure 9: Exemplar transformation plate of *EcNAGK* variants, demonstrating the array of library transformation efficiency.** Image was captured after 48 hours of incubation.

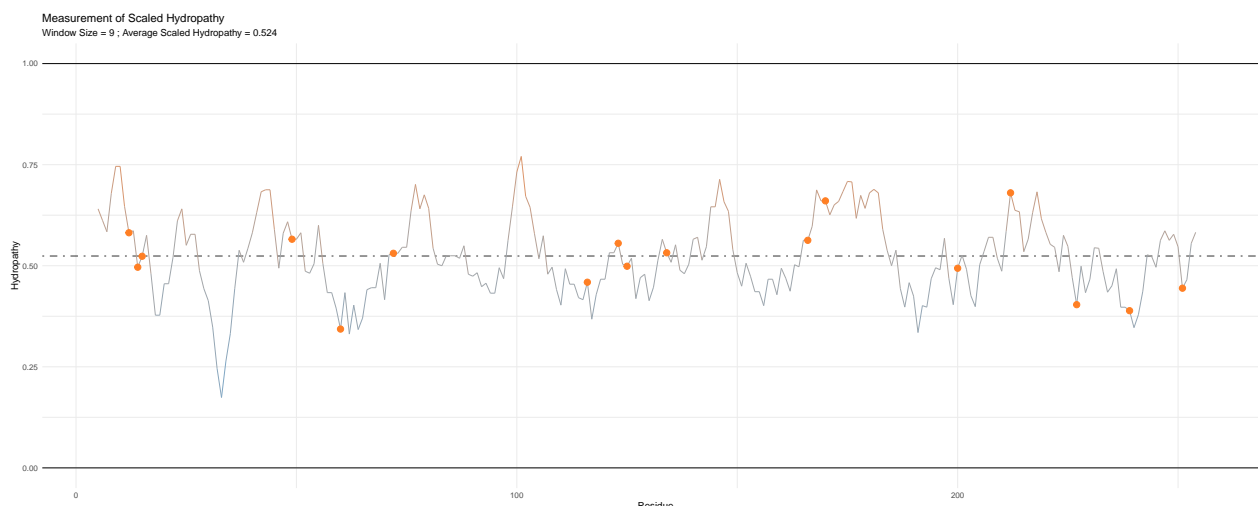

**Supplementary Figure 10: *EcNAGK* hydropathy plot with top performing candidates mutations.** Lineplot of the hydropathy index for the wild-type *EcNAGK* with higher values indicating more hydrophobicity and lower values indicating more hydrophilicity. The dots represent the locations of the mutations in the top performing candidates, namely "poe1", "sne2" and "sni1". Variant "sni1", with a single mutation in residue 258 is not presented on the plot due to smoothing but the global, non-smoothed, value of the hydropathy index for this residue is 0.7.

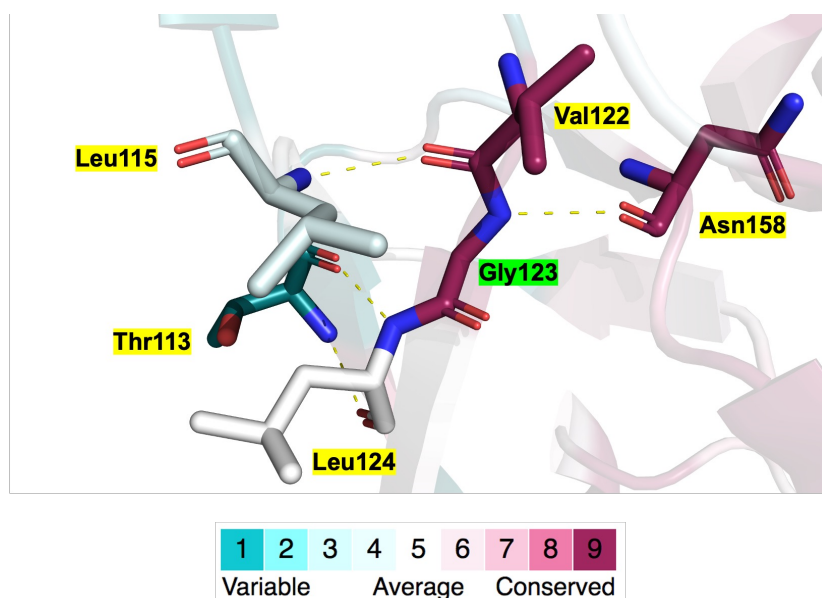

**Supplementary Figure 11: Conservation for Gly123.**  $\beta$ -sheet interactions between  $\beta_6$ ,  $\beta_7$  and  $\beta_{10}$  in wildtype *EcNAGK*, with evolutionary conservation score mapping (ConSurf). Gly123 is highlighted in green.

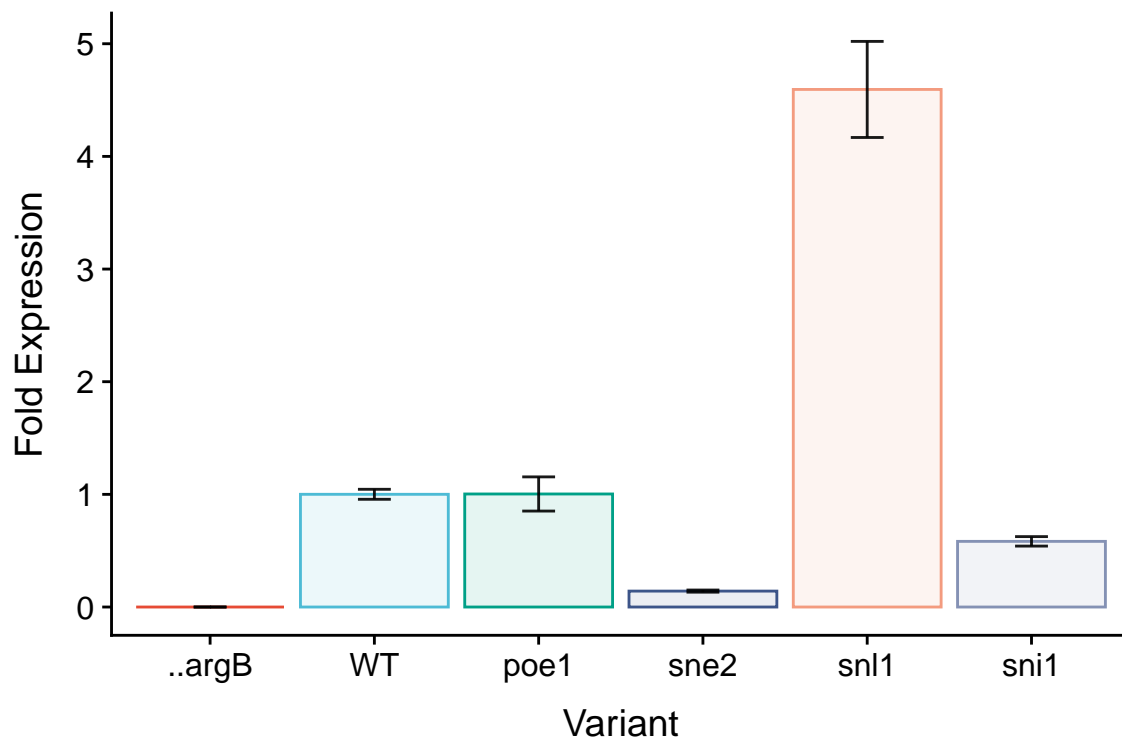

**Supplementary Figure 12: RT-qPCR of the top performing candidates from each category.**

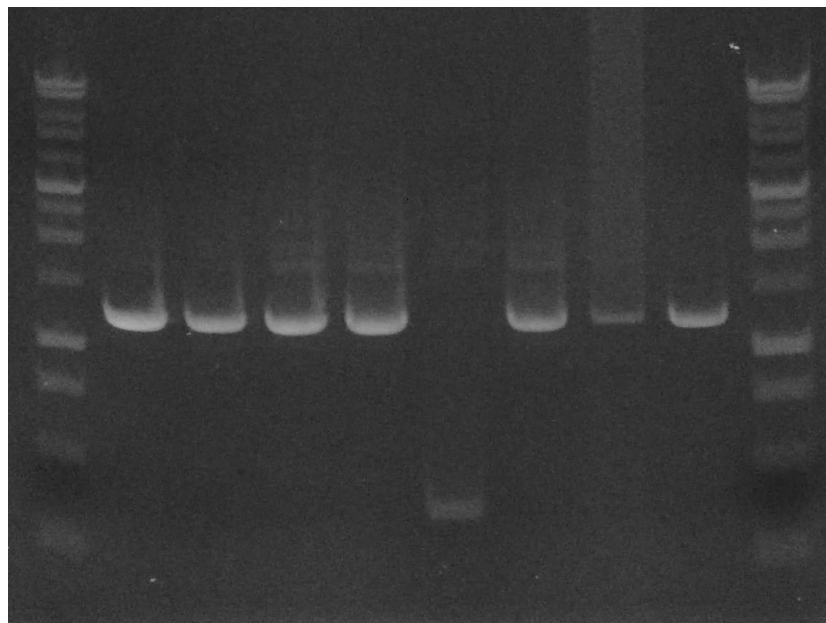

**Supplementary Figure 13: Uncropped scan of colony PCR (Supplementary Figure 5B). DNA ladder is in the first column. The rightmost column of is a duplicate of the same DNA ladder.**

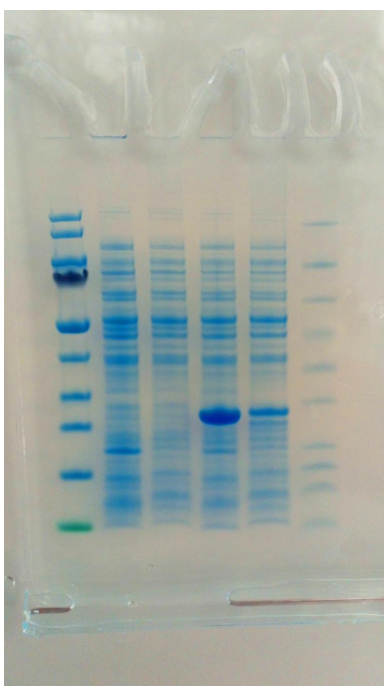

**Supplementary Figure 14: Uncropped scan of SDS-PAGE analysis (Supplementary Figure 5C). Molecular weights are in the first column. The rightmost column is an alternative molecular weight ladder that was not suitable for analysis.**

# Supplementary Tables

| Train set size | Reconstruction (PPL) | KL    | ELBO   | RMSE  | Spearman corr |
|----------------|----------------------|-------|--------|-------|---------------|
| 100K           | 114.80 (0.66)        | 9.44  | 124.24 | 9.27  | 0.96          |
| 75K            | 115.69 (0.66)        | 8.94  | 124.63 | 9.74  | 0.95          |
| 50K            | 116.48 (0.66)        | 8.16  | 124.64 | 11.24 | 0.94          |
| 25K            | 123.42 (0.65)        | 10.38 | 133.80 | 12.12 | 0.92          |

**Supplementary Table 1: Models performance on test set.** For each size of the training set, upon model convergence, we compute average metrics on the test set.

| Model    | Latent size | Reconstruction | Perplexity (PPL) | KL    | ELBO   | RMSE | Spearman corr |
|----------|-------------|----------------|------------------|-------|--------|------|---------------|
| original | 16          | 110.22         | 0.67             | 17.73 | 127.95 | 8.42 | 0.97          |
|          | 32          | 110.58         | 0.67             | 13.20 | 123.78 | 7.13 | 0.98          |
|          | 64          | 109.77         | 0.67             | 19.22 | 129.00 | 7.61 | 0.97          |
|          | 128         | 110.57         | 0.67             | 19.38 | 129.95 | 7.61 | 0.97          |
| small    | 16          | 110.93         | 0.67             | 17.59 | 128.52 | 6.92 | 0.98          |
|          | 32          | 108.42         | 0.67             | 19.32 | 127.74 | 8.84 | 0.97          |
|          | 64          | 109.49         | 0.67             | 16.86 | 126.35 | 7.02 | 0.98          |
|          | 128         | 110.20         | 0.67             | 16.74 | 126.94 | 6.84 | 0.98          |

**Supplementary Table 2: Hyperparameter analysis on test set.** We used our original model (6 encoder layers, 4 decoder layers, 512 embedding size, 8 heads) and a small model (3 encoder layers, 2 decoder layers, 256 embedding size, 4 heads) to evaluate the effects of the latent size and transformer size on the model performance. All models trained for 500 epochs until convergence.

| Model    | Latent size | Spearman corr | P-value  |
|----------|-------------|---------------|----------|
| original | 16          | 0.86          | 6.68e-13 |
|          | 32          | 0.93          | 3.41e-18 |
|          | 64          | 0.90          | 4.80e-15 |
|          | 128         | 0.87          | 2.30e-13 |
| small    | 16          | 0.87          | 2.13e-13 |
|          | 32          | 0.85          | 5.07e-12 |
|          | 64          | 0.90          | 5.30e-15 |
|          | 128         | 0.92          | 1.57e-17 |

**Supplementary Table 3: Hyperparameter analysis on 40 designed *Ec*NAGK variants.** We used our original model (6 encoder layers, 4 decoder layers, 512 embedding size, 8 heads) and a small model (3 encoder layers, 2 decoder layers, 256 embedding size, 4 heads) to compute Spearman correlation between FOLDX estimates and predicted energy values. Two-sided t-test was used to compute the p-values.

| Part                          | Part ID           | JUMP Part Origin  | Description                                                       |
|-------------------------------|-------------------|-------------------|-------------------------------------------------------------------|
| Promoter                      | J23100            | pJUMP19-J23100.P  | Constitutive strong promoter                                      |
| Ribosome Binding Site         | pET-RBS           | pJUMP18-RBS-pET_R | pET vector ribosome binding site                                  |
| Terminator                    | L1U1H09           | pJUMP19-L1U1H09.T | Synthetic terminator                                              |
| Backbone (destination) vector | pJUMP27-1A(sfGFP) | pJUMP27-1A(sfGFP) | Low copy plasmid with pSC101 origin and super-folder GFP reporter |

**Supplementary Table 4: Basic parts used for the creation of pKCHU-argB.**

| Primer  | JUMP Primer ID | Sequence           |
|---------|----------------|--------------------|
| Forward | PS1            | AGGGCGGCGGATTTGTCC |
| Reverse | PS2            | GCGGCAACCGAGCGTT   |

**Supplementary Table 5: Sequencing primers used for pKCHU-*argB* expression constructs (wildtype and variant).**

| Target                                     | Primer  | Sequence (5' → 3')   |
|--------------------------------------------|---------|----------------------|
| <i>rrsA</i>                                | Forward | TCCAGGTGTAGCGGTGAAAT |
|                                            | Reverse | TTGAGTTTTAACCTTGCGGC |
| <i>argB</i> (Native wildtype)              | Forward | AGACGAAGGGCAACTGATGA |
|                                            | Reverse | GCCGCGTTCACCTTCACTAT |
| <i>argB</i> (Re-coded wildtype + variants) | Forward | GTCCGCTGGTTATCGTTCAC |
|                                            | Reverse | TAACAGAGTCACCGTCACCC |

**Supplementary Table 6: RT-qPCR primers used for pKCHU-*argB* expression constructs (native wildtype, re-coded wildtype and variants) and *rrsA*.**

| Experiment | Lag Phase Duration/Hours | Standard Error | Fold Change |
|------------|--------------------------|----------------|-------------|
| WT         | 5.64                     | 0.038          | 1.00        |
| poe1       | 6.39                     | 0.304          | 1.13        |
| snl1       | 6.22                     | 0.159          | 1.10        |
| sni1       | 6.55                     | 0.059          | 1.16        |
| sne2       | 4.32                     | 0.192          | 0.77        |

**Supplementary Table 7: Lag phase duration for selected variants.**
